# Supplementary material for: The Sorcerer II Global Ocean Sampling Expedition: Metagenomic Characterization of Viruses within Aquatic Microbial Samples
Source: PLoS One. 2008 Jan 23;3(1):e1456. doi: 10.1371/journal.pone.0001456 (PMC2186209; doi:10.1371/journal.pone.0001456)
Supplement: Table S7 — (0.03 MB XLS) [file pone.0001456.s016.xls]

## Sheet: Sheet1
Table S7. Spearman rank order correlations between host-derived viral gene families, tailed phage-associated sequences, P-SSM4-associated sequences, Prochlorococcus-associated sequences and environmental parameters.
	psbA	psbD	petE	speD	hli	talC	pstS	phoH	Myovirus	Podovirus	Siphovirus	P-SSM4-like virus	Prochlorococcus	TSI	Water temperature	Salinity	Water depth
psbA	X	0.89;<0.01	0.29;0.05	0.62;<0.01	0.84;<0.01	0.89;<0.01	0.60;<0.01	0.54;<0.01	0.61;<0.01	NS	NS	0.67;<0.01	NS	-0.50;<0.01	0.62;<0.01	NS	.038; 0.01
psbD	0.89;<0.01	X	0.46;<0.01	0.69;<0.01	0.83;<0.01	0.88;<0.01	0.54;<0.01	0.62;<0.01	0.51;<0.01	NS	NS	NS	NS	-0.37;0.02	0.70;<0.01	NS	NS
petE	0.29;0.05	0.46;<0.01	X	0.33;0.02	NS	.044;<0.01	NS	NS	NS	NS	NS	NS	NS	NS	0.38;0.01	NS	NS
speD	0.62;<0.01	0.69;<0.01	0.33;0.02	X	0.70;<0.01	0.69;<0.01	0.53;<0.01	0.51;<0.01	0.39;<0.01	NS	NS	NS	NS	-0.32;0.05	0.58;<0.01	NS	NS
hli	0.84;<0.01	0.83;<0.01	NS	0.70;<0.01	X	0.76;<0.01	0.82;<0.01	0.46;<0.01	0.42;<0.01	NS	NS	0.71;<0.01	0.64;<0.01	-0.60;<0.01	0.68;<0.01	NS	0.43;<0.01
talC	0.89;<0.01	0.88;<0.01	.044;<0.01	0.69;<0.01	0.76;<0.01	X	0.47;<0.01	0.53;<0.01	0.52;<0.01	NS	NS	0.48;0.05	NS	NS	0.57;<0.01	NS	NS
pstS	0.60;<0.01	0.54;<0.01	NS	0.53;<0.01	0.82;<0.01	0.47;<0.01	X	0.35;0.01	NS	NS	-0.61;0.02	0.84;<0.01	0.74;<0.01	-0.71;<0.01	0.66;<0.01	0.46;<0.01	0.43;<0.01
phoH	0.54;<0.01	0.62;<0.01	NS	0.51;<0.01	0.46;<0.01	0.53;<0.01	0.35;0.01	X	0.32;0.03	NS	NS	NS	NS	NS	0.68;<0.01	NS	NS
Myovirus	0.61;<0.01	0.51;<0.01	NS	0.39;<0.01	0.42;<0.01	0.52;<0.01	NS	0.32;0.03	X	NS	NS	0.56;0.02	NS	NS	NS	NS	NS
Podovirus	NS	NS	NS	NS	NS	NS	NS	NS	NS	X	NS	-0.71;0.03	NS	NS	NS	NS	NS
Siphovirus	NS	NS	NS	NS	NS	NS	-0.61;0.02	NS	NS	NS	X	NS	NS	NS	NS	NS	NS
P-SSM4-like virus	0.67;<0.01	NS	NS	NS	0.71;<0.01	0.48;0.05	0.84;<0.01	NS	0.56;0.02	-0.71;0.03	NS	X	0.74; <0.01*	NS	NS	NS	NS
Prochlorococcus	NS	NS	NS	NS	0.64;<0.01	NS	0.74;<0.01	NS	NS	NS	NS	0.74; <0.01*	X	NS	NS	NS	NS
TSI	-0.50;<0.01	-0.37;0.02	NS	-0.32;0.05	-0.60;<0.01	NS	-0.71;<0.01	NS	NS	NS	NS	NS	NS	X	-0.67;<0.01	-0.77;<0.01	-0.75;<0.01
Water temperature	0.62;<0.01	0.70;<0.01	0.38;0.01	0.58;<0.01	0.68;<0.01	0.57;<0.01	0.66;<0.01	0.68;<0.01	NS	NS	NS	NS	NS	-0.67;<0.01	X	NS	NS
Salinity	NS	NS	NS	NS	NS	NS	0.46;<0.01	NS	NS	NS	NS	NS	NS	-0.77;<0.01	NS	X	0.52;<0.01
Water depth	.038; 0.01	NS	NS	NS	0.43;<0.01	NS	0.43;<0.01	NS	NS	NS	NS	NS	NS	-0.75;<0.01	NS	0.52;<0.01	X
* Correlation performed at a 90% identity cut-off value.
NS = Not significant
